# Supplementary material for: LGR6 Promotes Tumor Proliferation and Metastasis through Wnt/β-Catenin Signaling in Triple-Negative Breast Cancer
Source: PubMed Central journal article supplement — Mol Ther Oncolytics. 2020 Jun 24;18:351–9. doi: 10.1016/j.omto.2020.06.020 (PMC7403884; doi:10.1016/j.omto.2020.06.020), 2020-06-24

**OMTO, Volume 18**

**Supplemental Information**

**LGR6 Promotes Tumor Proliferation  
and Metastasis through Wnt/ $\beta$ -Catenin Signaling  
in Triple-Negative Breast Cancer**

**Yanan Kong, Xueqi Ou, Xing Li, Yan Zeng, Guanfeng Gao, Ning Lyu, and Peng Liu**

**Supplemental figure 1.** Three candidates were constructed and the most effective silenced shLGR6 was chosen for the follow experiments.

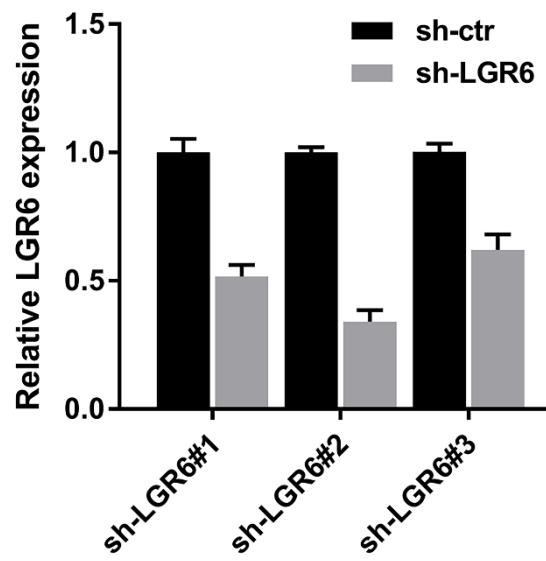

Supplement: mmc1.pdf [file mmc1.pdf]
